# Supplementary material for: Influencing walking behavior can increase the physical activity of patients with chronic pain hospitalized for multidisciplinary rehabilitation: an observational study
Source: PubMed Central journal article supplement (PMC6500043; doi:10.1186/s12891-019-2561-9), 2019-05-04
Supplement: 12891_2019_2561_MOESM1_ESM.pdf [file 12891_2019_2561_MOESM1_ESM.pdf]

# Influencing walking behavior can increase the physical activity of patients with chronic pain hospitalized for multidisciplinary rehabilitation: an observational study

<https://doi.org/10.1186/s12891-019-2561-9>

PHILIPPE TERRIER<sup>a,b,c</sup>, CAROLINE PRAZ<sup>b,c</sup>, JOANE LE CARRÉ<sup>b,c</sup>, PHILIPPE VUISTINER<sup>b,c</sup>,  
BERTRAND LÉGER<sup>b,c</sup>, FRANÇOIS LUTHI<sup>b,c</sup>.

<sup>a</sup> Haute Ecole Arc Santé, HES-SO University of Applied Sciences and Arts Western Switzerland, Neuchâtel, Switzerland

<sup>b</sup> IRR, Institute for Research in Rehabilitation, Sion, Switzerland

<sup>c</sup> Clinique romande de réadaptation SUVACare, Sion, Switzerland

## Supplementary Figures and Tables

---

|                                      |      |
|--------------------------------------|------|
| MODEL 1 (Figure S1 & Table S1) ..... | p. 2 |
| MODEL 2 (Figure S2 & Table S2) ..... | p. 3 |
| MODEL 3 (Figure S3 & Table S3) ..... | p. 4 |
| MODEL 4 (Figure S4 & Table S4) ..... | p. 5 |
| MODEL 5 (Table S5 & Table S6) .....  | p. 6 |
| MODEL 6 (Table S7 & Table S8) .....  | p. 7 |
| MODEL 7 (Table S9 & Table S10) ..... | p. 8 |
| RESIDUALS (Figure S5) .....          | p. 9 |

## Model 1: Moderate-to-vigorous physical activity at home and at the rehabilitation clinic

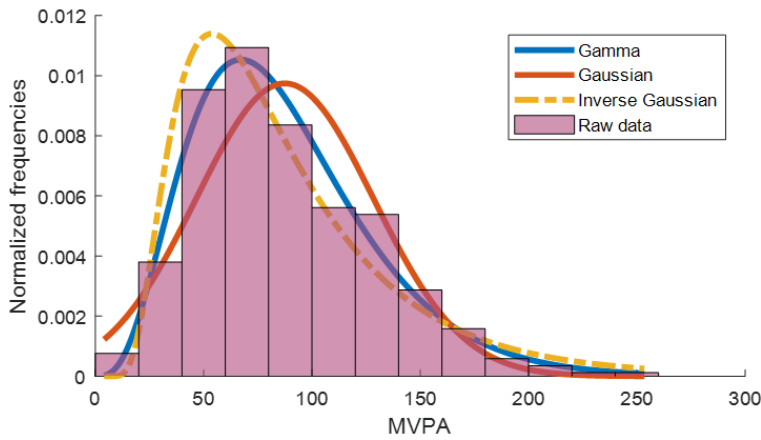

**Figure S1. MVPA Histogram.** Normalized frequencies as a function of MVPA and best-fit curves for Gamma, Gaussian and Inverse Gaussian distributions. N= 855 days.

**Table S1. Matlab output of Model 1.**

```
mdl=fitglm(data,'MVPA ~ 1 + Day_type +
(Day_type|Subject)', 'Distribution', 'Gamma', 'link', 'log', 'FitMethod', 'REML');
```

**Generalized linear mixed-effects model fit by PL**

**Model information:**

|                             |       |
|-----------------------------|-------|
| Number of observations      | 855   |
| Fixed effects coefficients  | 4     |
| Random effects coefficients | 372   |
| Covariance parameters       | 11    |
| Distribution                | Gamma |
| Link                        | Log   |
| FitMethod                   | REML  |

**Formula:**

```
MVPA ~ 1 + Day_type + (1 + Day_type | Subject)
```

**Model fit statistics:**

|        |        |               |          |
|--------|--------|---------------|----------|
| AIC    | BIC    | LogLikelihood | Deviance |
| 816.73 | 887.93 | -393.37       | 786.73   |

**Fixed effects coefficients (95% CIs):**

| Name          | Estimate | SE       | tStat  | DF  | pValue    | Lower    | Upper   |
|---------------|----------|----------|--------|-----|-----------|----------|---------|
| '(Intercept)' | 4.174    | 0.058212 | 71.702 | 851 | 0         | 4.0597   | 4.2882  |
| 'Day_type_2'  | 0.15531  | 0.038882 | 3.9945 | 851 | 7.044e-05 | 0.078997 | 0.23163 |
| 'Day_type_3'  | 0.12437  | 0.048288 | 2.5756 | 851 | 0.010176  | 0.029591 | 0.21914 |
| 'Day_type_4'  | 0.38848  | 0.058894 | 6.5963 | 851 | 7.401e-11 | 0.27289  | 0.50408 |

**Random effects covariance parameters:**

Group: Subject (93 Levels)

| Name1         | Name2         | Type   | Estimate  |
|---------------|---------------|--------|-----------|
| '(Intercept)' | '(Intercept)' | 'std'  | 0.48213   |
| 'Day_type_2'  | '(Intercept)' | 'corr' | -0.64506  |
| 'Day_type_3'  | '(Intercept)' | 'corr' | -0.73858  |
| 'Day_type_4'  | '(Intercept)' | 'corr' | -0.81103  |
| 'Day_type_2'  | 'Day_type_2'  | 'std'  | 0.18637   |
| 'Day_type_3'  | 'Day_type_2'  | 'corr' | -0.030467 |
| 'Day_type_4'  | 'Day_type_2'  | 'corr' | 0.21964   |
| 'Day_type_3'  | 'Day_type_3'  | 'std'  | 0.18957   |
| 'Day_type_4'  | 'Day_type_3'  | 'corr' | 0.81085   |
| 'Day_type_4'  | 'Day_type_4'  | 'std'  | 0.44055   |

Group: Error

| Name               | Estimate |
|--------------------|----------|
| 'sqrt(Dispersion)' | 0.30944  |

## Model 2: Univariable GLMM for day type effects on moderate-to-vigorous physical activity (MVPA)

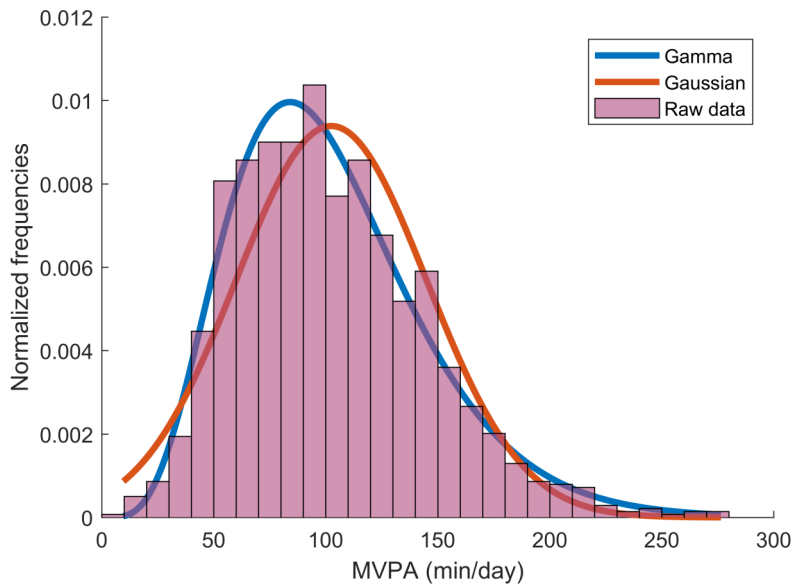

**Figure S2. MVPA Histogram.** Normalized frequencies as a function of MVPA and best-fit curves for Gamma and Gaussian distributions. N= 1388 days.

**Table S2. Matlab output of Model 2.**

```
mdl =fitglme(data, 'MVPA ~ 1 + Day_Type + (Day_Type|Subject)', 'Distribution', 'Gamma', 'link', 'log', 'FitMethod', 'REML');
```

**Generalized linear mixed-effects model fit by PL**

Model information:

|                             |       |
|-----------------------------|-------|
| Number of observations      | 1388  |
| Fixed effects coefficients  | 2     |
| Random effects coefficients | 544   |
| Covariance parameters       | 4     |
| Distribution                | Gamma |
| Link                        | Log   |
| FitMethod                   | REML  |

Formula:

MVPA ~ 1 + Day\_Type + (1 + Day\_Type | Subject)

Model fit statistics:

|        |        |               |          |
|--------|--------|---------------|----------|
| AIC    | BIC    | LogLikelihood | Deviance |
| 1054.5 | 1085.9 | -521.25       | 1042.5   |

Fixed effects coefficients (95% CIs):

| Name          | Estimate | SE       | tStat  | DF   | pValue     | Lower   | Upper   |
|---------------|----------|----------|--------|------|------------|---------|---------|
| '(Intercept)' | 4.346    | 0.028928 | 150.23 | 1386 | 0          | 4.2893  | 4.4028  |
| 'Day_Type_1'  | 0.29655  | 0.028327 | 10.469 | 1386 | 9.7834e-25 | 0.24098 | 0.35212 |

Random effects covariance parameters:

Group: Subject (272 Levels)

| Name1         | Name2         | Type   | Estimate |
|---------------|---------------|--------|----------|
| '(Intercept)' | '(Intercept)' | 'std'  | 0.38555  |
| 'Day_Type_1'  | '(Intercept)' | 'corr' | -0.68456 |
| 'Day_Type_1'  | 'Day_Type_1'  | 'std'  | 0.34486  |

Group: Error

| Name               | Estimate |
|--------------------|----------|
| 'sqrt(Dispersion)' | 0.26912  |

**Model 3: Univariable GLMM for day type effects on walking activity (WA)**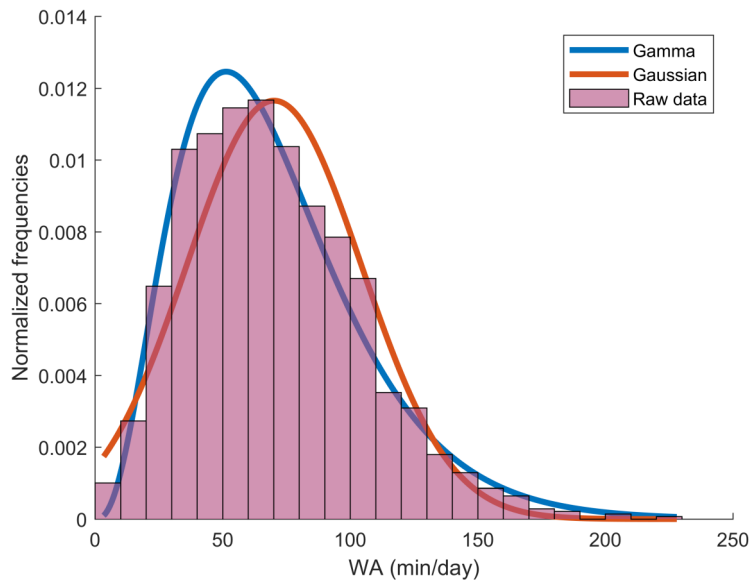

**Figure S3. WA Histogram.** Normalized frequencies as a function of WA and best-fit curves for Gamma and Gaussian distributions. N= 1388 days.

**Table S3. Matlab output of Model 3.**

```
mdl =fitglme(data, 'WA~ 1 + Day_Type +
(Day_Type|Subject)', 'Distribution', 'Gamma', 'link', 'log', 'FitMethod', 'REML');
```

**Generalized linear mixed-effects model fit by PL**

Model information:

|                             |       |
|-----------------------------|-------|
| Number of observations      | 1388  |
| Fixed effects coefficients  | 2     |
| Random effects coefficients | 544   |
| Covariance parameters       | 4     |
| Distribution                | Gamma |
| Link                        | Log   |
| FitMethod                   | REML  |

Formula:

WA ~ 1 + Day\_Type + (1 + Day\_Type | Subject)

Model fit statistics:

| AIC    | BIC    | LogLikelihood | Deviance |
|--------|--------|---------------|----------|
| 1528.5 | 1559.9 | -758.23       | 1516.5   |

Fixed effects coefficients (95% CIs):

| Name          | Estimate | SE       | tStat  | DF   | pValue     | Lower  | Upper  |
|---------------|----------|----------|--------|------|------------|--------|--------|
| '(Intercept)' | 3.7781   | 0.035947 | 105.1  | 1386 | 0          | 3.7076 | 3.8487 |
| 'Day_Type_1'  | 0.50425  | 0.035709 | 14.121 | 1386 | 2.1052e-42 | 0.4342 | 0.5743 |

Random effects covariance parameters:

Group: Subject (272 Levels)

| Name1         | Name2         | Type   | Estimate |
|---------------|---------------|--------|----------|
| '(Intercept)' | '(Intercept)' | 'std'  | 0.48745  |
| 'Day_Type_1'  | '(Intercept)' | 'corr' | -0.70506 |
| 'Day_Type_1'  | 'Day_Type_1'  | 'std'  | 0.45291  |

Group: Error

| Name               | Estimate |
|--------------------|----------|
| 'sqrt(Dispersion)' | 0.3119   |

**Model 4: Univariable GLMM for day type effects on long walks (LW)**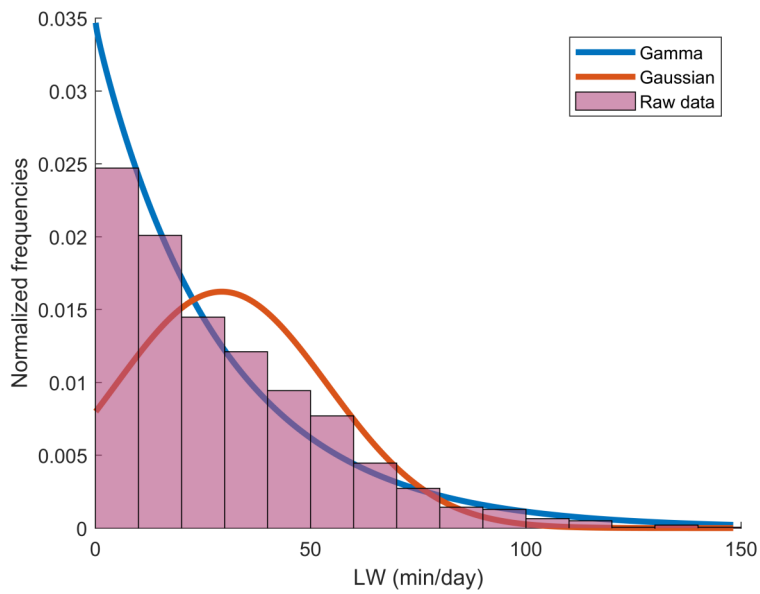

**Figure S4. LW Histogram.** Normalized frequencies as a function of LW and best-fit curves for Gamma and Gaussian distributions. N= 1388 days.

**Table S4. Matlab output of Model 4.**

```
mdl =fitglme(data,'LW~ 1 + Day_Type +
(Day_Type|Subject)', 'Distribution', 'Gamma', 'link', 'log', 'FitMethod', 'REML');
```

**Generalized linear mixed-effects model fit by PL**

Model information:

|                             |       |
|-----------------------------|-------|
| Number of observations      | 1388  |
| Fixed effects coefficients  | 2     |
| Random effects coefficients | 544   |
| Covariance parameters       | 4     |
| Distribution                | Gamma |
| Link                        | Log   |
| FitMethod                   | REML  |

Formula:

```
LW ~ 1 + Day_Type + (1 + Day_Type | Subject)
```

Model fit statistics:

|        |        |               |          |
|--------|--------|---------------|----------|
| AIC    | BIC    | LogLikelihood | Deviance |
| 3329.2 | 3360.6 | -1658.6       | 3317.2   |

Fixed effects coefficients (95% CIs):

| Name          | Estimate | SE       | tStat  | DF   | pValue     | Lower  | Upper  |
|---------------|----------|----------|--------|------|------------|--------|--------|
| '(Intercept)' | 1.9786   | 0.092186 | 21.463 | 1386 | 1.8507e-88 | 1.7978 | 2.1594 |
| 'Day_Type_1'  | 1.3917   | 0.090186 | 15.431 | 1386 | 1.0657e-49 | 1.2148 | 1.5686 |

Random effects covariance parameters:

Group: Subject (272 Levels)

| Name1         | Name2         | Type   | Estimate |
|---------------|---------------|--------|----------|
| '(Intercept)' | '(Intercept)' | 'std'  | 1.3207   |
| 'Day_Type_1'  | '(Intercept)' | 'corr' | -0.88808 |
| 'Day_Type_1'  | 'Day_Type_1'  | 'std'  | 1.2464   |

Group: Error

| Name               | Estimate |
|--------------------|----------|
| 'sqrt(Dispersion)' | 0.56993  |

**Model 5: Multivariable GLMM for moderate-to-vigorous physical activity (MVPA)****Table S5. Matlab ANOVA analysis of Model 5**

```
mdl = fitglme(data, 'MVPA ~ 1 + PI * Site * Day_Type +
(Day_Type|Subject)', 'Distribution', 'Gamma', 'link', 'log', 'FitMethod', 'MPL');
anova(mdl)
```

**ANOVA marginal tests: DFMethod = 'residual'**

| Term               | FStat    | DF1 | DF2  | pValue     |
|--------------------|----------|-----|------|------------|
| '(Intercept)'      | 8123.5   | 1   | 1348 | 0          |
| 'Day_Type'         | 43.302   | 1   | 1348 | 6.6972e-11 |
| 'PI'               | 0.651    | 1   | 1348 | 0.4199     |
| 'Site'             | 0.078317 | 2   | 1348 | 0.92468    |
| 'Day_Type:PI'      | 0.41375  | 1   | 1348 | 0.52018    |
| 'Day_Type:Site'    | 1.2733   | 2   | 1348 | 0.28024    |
| 'PI:Site'          | 4.6021   | 2   | 1348 | 0.010189   |
| 'Day_Type:PI:Site' | 4.0144   | 2   | 1348 | 0.018271   |

**Table S6. Matlab output of Model 5**

```
mdl = fitglme(data, 'MVPA ~ 1 + Day_Type + PI * Site + Day_Type:PI:Site +
(Day_Type|Subject)', 'Distribution', 'Gamma', 'link', 'log', 'FitMethod', 'REML');
```

**Generalized linear mixed-effects model fit by PL**

Model information:

|                             |       |
|-----------------------------|-------|
| Number of observations      | 1360  |
| Fixed effects coefficients  | 9     |
| Random effects coefficients | 534   |
| Covariance parameters       | 4     |
| Distribution                | Gamma |
| Link                        | Log   |
| FitMethod                   | REML  |

Formula:

MVPA ~ 1 + Day\_Type + PI\*Site + Day\_Type:PI:Site + (1 + Day\_Type | Subject)

Model fit statistics:

| AIC    | BIC    | LogLikelihood | Deviance |
|--------|--------|---------------|----------|
| 1034.5 | 1102.2 | -504.26       | 1008.5   |

Fixed effects coefficients (95% CIs):

| Name                   | Estimate   | SE       | tStat    | DF   | pValue     | Lower     | Upper      |
|------------------------|------------|----------|----------|------|------------|-----------|------------|
| '(Intercept)'          | 4.4094     | 0.039106 | 112.76   | 1351 | 0          | 4.3327    | 4.4861     |
| 'Day_Type_1'           | 0.2786     | 0.030132 | 9.246    | 1351 | 8.8002e-20 | 0.21949   | 0.33771    |
| 'PI'                   | -0.029748  | 0.01524  | -1.9519  | 1351 | 0.051153   | -0.059644 | 0.00014923 |
| 'Site_2'               | -0.09783   | 0.052583 | -1.8605  | 1351 | 0.063032   | -0.20098  | 0.0053226  |
| 'Site_3'               | -0.051856  | 0.043377 | -1.1955  | 1351 | 0.23212    | -0.13695  | 0.033238   |
| 'PI:Site_2'            | -0.075762  | 0.031161 | -2.4313  | 1351 | 0.015174   | -0.13689  | -0.014633  |
| 'PI:Site_3'            | 0.0098085  | 0.0264   | 0.37153  | 1351 | 0.7103     | -0.041982 | 0.061599   |
| 'Day_Type_1:PI:Site_2' | 0.065155   | 0.02675  | 2.4357   | 1351 | 0.014991   | 0.012679  | 0.11763    |
| 'Day_Type_1:PI:Site_3' | -0.0087286 | 0.02138  | -0.40826 | 1351 | 0.68314    | -0.05067  | 0.033213   |

Random effects covariance parameters:

Group: Subject (267 Levels)

| Name1         | Name2         | Type   | Estimate |
|---------------|---------------|--------|----------|
| '(Intercept)' | '(Intercept)' | 'std'  | 0.37114  |
| 'Day_Type_1'  | '(Intercept)' | 'corr' | -0.6916  |
| 'Day_Type_1'  | 'Day_Type_1'  | 'std'  | 0.34786  |

Group: Error

| Name               | Estimate |
|--------------------|----------|
| 'sqrt(Dispersion)' | 0.26535  |

**Model 6: Multivariable GLMM for walking activity (WA)****Table S7. Matlab ANOVA analysis of Model 6**

```
mdl = fitglme(data, 'WA ~ 1 + PI * Site * Day_Type +
(Day_Type|Subject)', 'Distribution', 'Gamma', 'link', 'log', 'FitMethod', 'MPL');
anova(mdl)
```

**ANOVA marginal tests: DFMethod = 'residual'**

| Term               | FStat   | DF1 | DF2  | pValue     |
|--------------------|---------|-----|------|------------|
| '(Intercept)'      | 3864.1  | 1   | 1348 | 0          |
| 'Day_Type'         | 78.925  | 1   | 1348 | 2.0177e-18 |
| 'PI'               | 0.66817 | 1   | 1348 | 0.41383    |
| 'Site'             | 0.11266 | 2   | 1348 | 0.89346    |
| 'Day_Type:PI'      | 0.22924 | 1   | 1348 | 0.63216    |
| 'Day_Type:Site'    | 1.7164  | 2   | 1348 | 0.1801     |
| 'PI:Site'          | 3.8504  | 2   | 1348 | 0.021505   |
| 'Day_Type:PI:Site' | 3.7847  | 2   | 1348 | 0.022958   |

**Table S8. Matlab output of Model 6**

```
mdl = fitglme(data, 'WA ~ 1 + Day_Type + PI * Site + Day_Type:PI:Site +
(Day_Type|Subject)', 'Distribution', 'Gamma', 'link', 'log', 'FitMethod', 'REMP');
```

**Generalized linear mixed-effects model fit by PL**

Model information:

|                             |       |
|-----------------------------|-------|
| Number of observations      | 1360  |
| Fixed effects coefficients  | 9     |
| Random effects coefficients | 534   |
| Covariance parameters       | 4     |
| Distribution                | Gamma |
| Link                        | Log   |
| FitMethod                   | REMP  |

Formula:

WA ~ 1 + Day\_Type + PI\*Site + Day\_Type:PI:Site + (1 + Day\_Type | Subject)

Model fit statistics:

| AIC    | BIC    | LogLikelihood | Deviance |
|--------|--------|---------------|----------|
| 1517.7 | 1585.4 | -745.85       | 1491.7   |

Fixed effects coefficients (95% CIs):

| Name                   | Estimate  | SE       | tStat    | DF   | pValue    | Lower     | Upper     |
|------------------------|-----------|----------|----------|------|-----------|-----------|-----------|
| '(Intercept)'          | 3.8349    | 0.04891  | 78.409   | 1351 | 0         | 3.739     | 3.9309    |
| 'Day_Type_1'           | 0.48015   | 0.037926 | 12.66    | 1351 | 8.526e-35 | 0.40575   | 0.55455   |
| 'PI'                   | -0.034033 | 0.018993 | -1.7919  | 1351 | 0.073381  | -0.071293 | 0.0032264 |
| 'Site_2'               | -0.095419 | 0.065431 | -1.4583  | 1351 | 0.14499   | -0.22378  | 0.032938  |
| 'Site_3'               | -0.019085 | 0.054044 | -0.35314 | 1351 | 0.72404   | -0.1251   | 0.086934  |
| 'PI:Site_2'            | -0.073756 | 0.038998 | -1.8913  | 1351 | 0.058798  | -0.15026  | 0.0027463 |
| 'PI:Site_3'            | 0.028772  | 0.033037 | 0.87093  | 1351 | 0.38395   | -0.036036 | 0.093581  |
| 'Day_Type_1:PI:Site_2' | 0.077269  | 0.033639 | 2.297    | 1351 | 0.02177   | 0.011279  | 0.14326   |
| 'Day_Type_1:PI:Site_3' | -0.012245 | 0.026914 | -0.45498 | 1351 | 0.6492    | -0.065043 | 0.040552  |

Random effects covariance parameters:

Group: Subject (267 Levels)

| Name1         | Name2         | Type   | Estimate |
|---------------|---------------|--------|----------|
| '(Intercept)' | '(Intercept)' | 'std'  | 0.47501  |
| 'Day_Type_1'  | '(Intercept)' | 'corr' | -0.7028  |
| 'Day_Type_1'  | 'Day_Type_1'  | 'std'  | 0.45362  |

Group: Error

| Name               | Estimate |
|--------------------|----------|
| 'sqrt(Dispersion)' | 0.30959  |

**Model 7: Multivariable GLMM for long walks (LW)****Table S9. Matlab ANOVA analysis of Model 7**

```
mdl = fitglme(data, 'LW ~ 1 + PI * Site * Day_Type +
(Day_Type|Subject)', 'Distribution', 'Gamma', 'link', 'log', 'FitMethod', 'MPL');
anova(mdl)
```

**ANOVA marginal tests: DFMethod = 'residual'**

| Term               | FStat   | DF1 | DF2  | pValue     |
|--------------------|---------|-----|------|------------|
| '(Intercept)'      | 157.23  | 1   | 1348 | 3.3929e-34 |
| 'Day_Type'         | 91.817  | 1   | 1348 | 4.3849e-21 |
| 'PI'               | 0.45594 | 1   | 1348 | 0.49964    |
| 'Site'             | 0.43166 | 2   | 1348 | 0.64952    |
| 'Day_Type:PI'      | 0.04171 | 1   | 1348 | 0.8382     |
| 'Day_Type:Site'    | 1.7554  | 2   | 1348 | 0.17323    |
| 'PI:Site'          | 1.8851  | 2   | 1348 | 0.15221    |
| 'Day_Type:PI:Site' | 2.126   | 2   | 1348 | 0.11971    |

**Table S10. Matlab output of Model 7**

```
mdl = fitglme(data, 'LW ~ 1 + Day_Type + PI + Site +
(Day_Type|Subject)', 'Distribution', 'Gamma', 'link', 'log', 'FitMethod', 'REMP');
```

**Generalized linear mixed-effects model fit by PL**

Model information:

|                             |       |
|-----------------------------|-------|
| Number of observations      | 1360  |
| Fixed effects coefficients  | 5     |
| Random effects coefficients | 534   |
| Covariance parameters       | 4     |
| Distribution                | Gamma |
| Link                        | Log   |
| FitMethod                   | REMP  |

Formula:

```
LW ~ 1 + Day_Type + PI + Site + (1 + Day_Type | Subject)
```

Model fit statistics:

| AIC    | BIC    | LogLikelihood | Deviance |
|--------|--------|---------------|----------|
| 3261.5 | 3308.4 | -1621.8       | 3243.5   |

Fixed effects coefficients (95% CIs):

| Name          | Estimate  | SE       | tStat   | DF   | pValue     | Lower     | Upper     |
|---------------|-----------|----------|---------|------|------------|-----------|-----------|
| '(Intercept)' | 2.0627    | 0.10886  | 18.949  | 1355 | 3.2422e-71 | 1.8492    | 2.2763    |
| 'Day_Type_1'  | 1.3663    | 0.08965  | 15.24   | 1355 | 1.5862e-48 | 1.1904    | 1.5422    |
| 'PI'          | -0.038271 | 0.02033  | -1.8825 | 1355 | 0.059983   | -0.078153 | 0.0016106 |
| 'Site_2'      | -0.17206  | 0.11282  | -1.5251 | 1355 | 0.12746    | -0.39338  | 0.049257  |
| 'Site_3'      | -0.053089 | 0.097145 | -0.5465 | 1355 | 0.58481    | -0.24366  | 0.13748   |

Random effects covariance parameters:

Group: Subject (267 Levels)

| Name1         | Name2         | Type   | Estimate |
|---------------|---------------|--------|----------|
| '(Intercept)' | '(Intercept)' | 'std'  | 1.3062   |
| 'Day_Type_1'  | '(Intercept)' | 'corr' | -0.88596 |
| 'Day_Type_1'  | 'Day_Type_1'  | 'std'  | 1.2217   |

Group: Error

| Name               | Estimate |
|--------------------|----------|
| 'sqrt(Dispersion)' | 0.56787  |



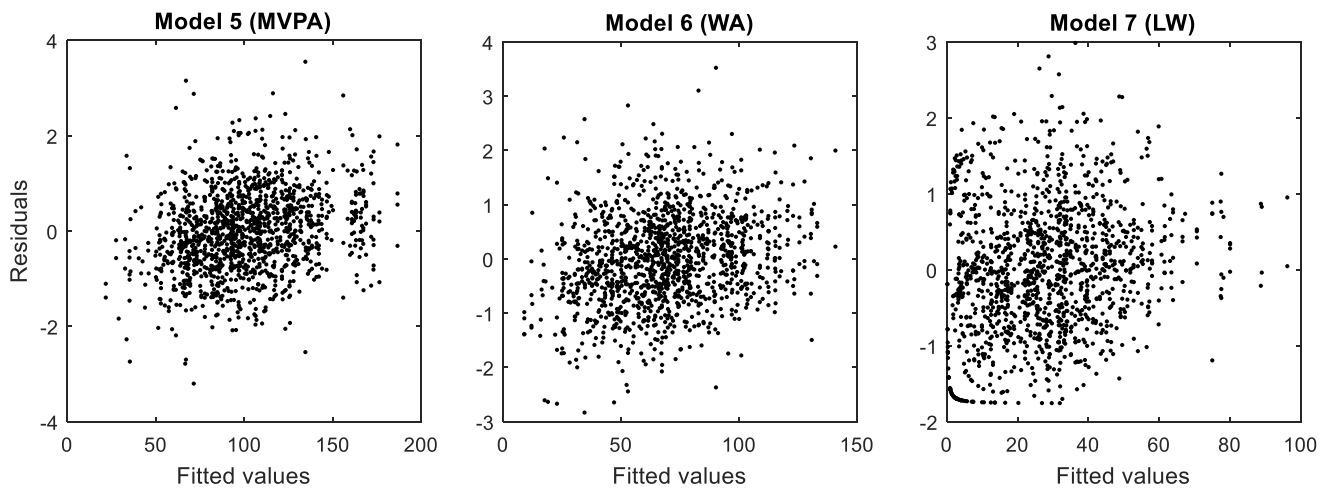

**Fig. S5. Pearson's residuals of the multivariable models. Contributions from both fixed effects and random effects (conditional).**
